1 *C9orf72*- derived proline:arginine poly-dipeptides disturb cytoskeletal architecture

2

3 Tomo Shiota<sup>1†</sup>, Riko Nagata<sup>2†</sup>, Sotaro Kikuchi<sup>2</sup>, Hitoki Nanaura<sup>1</sup>, Masaya Matsubayashi<sup>2</sup>, Mari  
4 Nakanishi<sup>2</sup>, Shinko Kobashigawa<sup>2</sup>, Kazuaki Nagayama<sup>3</sup>, Kazuma Sugie<sup>1</sup>, Yoshito Yamashiro<sup>4\*</sup>,  
5 Eiichiro Mori<sup>2\*</sup>

6 <sup>1</sup>Department of Neurology, Nara Medical University, Kashihara, Nara, Japan.

7 <sup>2</sup>Department of Future Basic Medicine, Nara Medical University, Kashihara, Nara, Japan.

8 <sup>3</sup>Micro-Nano Biomechanics Laboratory, Department of Mechanical Systems Engineering, Ibaraki  
9 University, Ibaraki, Japan.

10 <sup>4</sup>Life Science Center for Survival Dynamics, Tsukuba Advanced Research Alliance, Ibaraki, Japan.

11 †equal contributions

12 \*Corresponding authors. E-mail: yamayoshito@tara.tsukuba.ac.jp; emori@naramed-u.ac.jp.

13

14

1 **Abstract**

2 Amyotrophic lateral sclerosis (ALS) is an irreversible neurodegenerative disease caused by the  
3 degeneration of motor neurons, and cytoskeletal instability is considered to be involved in  
4 neurodegeneration. A hexanucleotide repeat expansion of the *C9orf72*, one of the most common  
5 causes of familial ALS, produces toxic proline:arginine (PR) poly-dipeptides. PR poly-dipeptides  
6 binds polymeric forms of low complexity sequences and intracellular puncta, thereby altering  
7 intermediate filaments (IFs). However, how PR poly-dipeptides affect the cytoskeleton, including  
8 IFs, microtubules and actin filaments, remains unknown. Here we performed a synthetic PR  
9 poly-dipeptide treatment on mammalian cells and investigated how it affects morphology of  
10 cytoskeleton and cell behaviors. We observed that PR poly-dipeptide treatment induce the  
11 degradation of vimentin bundles at perinucleus and dissociation of  $\beta$ -tubulin network. PR  
12 poly-dipeptides also lead to alteration of actin filaments toward to cell contours and strength cortical  
13 actin filaments via activation of ERM (ezrin/radixin/moesin) proteins. In addition, we found that PR  
14 poly-dipeptides promote phosphorylation of paxillin and recruitment of vinculin on focal adhesions,  
15 which lead to maturation of focal adhesions. Finally, we evaluated the effects of PR poly-dipeptides  
16 on mechanical property and stress response. Interestingly, treatment of PR poly-dipeptides increased  
17 the elasticity of the cell surface, leading to maladaptive response to cyclic stretch. These results  
18 suggest that PR poly-dipeptides cause mechanically sensitive structural reorganization and disrupt  
19 the cytoskeleton architecture.

20

21 **Keywords:** ALS, *C9orf72*, PR poly-dipeptides, intermediate filament, microtubule, actin  
22 cytoskeleton

23

24

## 1 **Introduction**

2 Amyotrophic lateral sclerosis (ALS), a common neurodegenerative disease, causes muscle  
3 atrophy and weakness by progressive and selective loss of motor neurons [Rowland and Shneider,  
4 2001]. A hexanucleotide repeat expansion in *C9orf72* is common in familial ALS with  
5 frontotemporal dementia [DeJesus-Hernandez et al., 2011], which induces autophagy [Webster et al.,  
6 2016] and defects nucleocytoplasmic transport [Zhang et al., 2018; Zhang et al., 2015] in ALS  
7 pathology. The *C9orf72* mutation produces toxic proline:arginine (PR) poly-dipeptides [Kwon et al.,  
8 2014]. PR poly-dipeptides penetrate cell membrane and localize to membrane-free organelles. PR  
9 poly-dipeptides also inhibit mRNA splicing and ribosomal RNA biogenesis, eventually causing cell  
10 death [Kwon et al., 2014], which target proteins with low-complexity (LC) domains, including  
11 cytoskeletal proteins [Lin et al., 2016].

12 The cytoskeleton is composed of three distinct species: actin filaments, microtubules, and  
13 intermediate filaments (IFs). Many neurodegenerative diseases show genetic abnormalities  
14 associated with cytoskeletal proteins. Neurofilament light-chain (NFL) encoded by the *NEFL* gene is  
15 the causative gene for Charcot-Marie-Tooth disease type 2E (CMT2E) and ALS [De Jonghe et al.,  
16 2001]. The accumulation of phosphorylated neurofilaments (NF) is a characteristic pathological  
17 finding of ALS [Leigh et al., 1989]. Cytoskeleton-related genes, such as *PFN1* and *TUBA4A* which  
18 respectively encode actin filaments and microtubules, are also identified as causative genes for ALS  
19 [Smith et al., 2014; Wu et al., 2012]. In addition, the morphology of actin filaments and microtubules  
20 is abnormal in these familial ALS mutations [Heo et al., 2018; Smith et al., 2014]. These data  
21 suggest that abnormalities of cytoskeleton are involved in ALS pathology. PR poly-dipeptides bind  
22 to vimentin and disassemble vimentin in vitro [Lin et al., 2016], and may induce morphological  
23 changes to the cytoskeleton.

24 The cytoskeleton, especially actin filaments, binds to focal adhesion proteins to maintain  
25 cell morphology and polarity and to modulate extracellular mechanics [Fletcher and Mullins, 2010;  
26 Hurtley, 1998]. Focal adhesion is the linkage between actin filaments and plasma membranes. It is a  
27 complex structure consisting of multiple proteins such as integrin, vinculin, paxillin, focal adhesion  
28 kinase (FAK), talin, zyxin, alpha-actinin, vasodilator-stimulated phosphoprotein (VASP), and other  
29 proteins [Abercrombie and Dunn, 1975]. Abnormal focal adhesions are also associated to  
30 neurodegenerative diseases such as Parkinson's disease [Edwards et al., 2011] and Alzheimer's  
31 disease [Leshchyn'ska and Sytnyk, 2016]. Vinculin is found in the Hirano body, a hallmark  
32 pathology of ALS [Galloway et al., 1987], which suggests that focal adhesion contributes to ALS.

33 Although these pathological findings in ALS suggest the involvement of the cytoskeleton  
34 and focal adhesion in the pathogenesis of ALS, the manner in which *C9orf72*-derived PR  
35 poly-dipeptides affect these structures remains elusive. In this study, we investigated that PR  
36 poly-dipeptides disrupted the architecture of the cytoskeleton and enhanced focal adhesion. We

1 observed the morphological changes in the cytoskeleton and focal adhesion proteins by using  
2 fluorescens imaging. As these structures are involved in mechanical stress [Burridge and Guilluy,  
3 2016], we evaluated the mechanical stress response by using atomic force microscopy (AFM) and  
4 cyclic stretch experiment.

5

## 6 **Methods**

### 7 *Peptide synthesis*

8 A synthetic peptide consisting of twenty repeats of the PR poly-dipeptide (PR<sub>20</sub>) with an HA tag at  
9 the carboxyl terminus was synthesized (SCRUM, Tokyo).

10

### 11 *Cell culture*

12 Human osteosarcoma cells U2OS were cultured in Dulbecco's modified Eagle medium (DMEM)  
13 high glucose with 10% fetal bovine serum (FBS) and 1% penicillin-streptomycin at 37°C in 5% CO<sub>2</sub>.  
14 The U2OS cells were used for experiments after a one-hour treatment at 37°C with a synthetic  
15 peptide consisting of PR<sub>20</sub> (final concentration 10µM). Rat vascular SMCs (Lonza, R-ASM-580)  
16 were grown in DMEM with 20% FBS and 1x Antibiotic-Antimycotic (Thermo Fisher Scientific).

17

### 18 *Fluorescence imaging of cytoskeleton*

19 The U2OS cells or rat vascular SMCs were fixed in 4% paraformaldehyde in Phosphate-Buffered  
20 Saline (PBS) at room temperature 15 min and permeabilized with 0.1% Triton X-100 in PBS for 10  
21 min. The fixed cells were incubated with a blocking solution (5% bovine serum albumin in PBS with  
22 0.1% Tween20) at room temperature for one hour. The cells were incubated with primary antibodies,  
23 vimentin (Santa Cruz Biotechnology, sc6260), vinculin (Abcam, ab129002), phospho-paxillin (Cell  
24 Signaling, 2541S), or phospho-ERM (Cell Signaling, 3726S) in the blocking solution at 4°C  
25 overnight. Secondary antibodies (Thermo Fisher Scientific, A-21422, A-21429) were incubated at  
26 room temperature for one hour in the blocking solution. Alexa Fluor488-phalloidin (Thermo Fisher  
27 Scientific, A12379) and Alexa Fluor555-β-tubulin (Abcam, ab206627) were also incubated at room  
28 temperature for an hour in the blocking solution. Images were captured using the confocal  
29 microscope FV3000 (Olympus, Tokyo) or LSM 710 (ZEISS). Captured images were analyzed by  
30 ImageJ (NIH) and FIJI with QuimP plugin, which provided by University of Warwick [Baniukiewicz  
31 et al., 2018] and Tubeness plugin (<https://imagej.net/Tubeness>).

32

### 33 *Atomic force microscopy*

34 Atomic force microscopy (AFM) measurements were performed using a NanoWizard IV AFM (JPK  
35 Instruments-AG, Germany) mounted on top of an inverted optical microscope (IX73, Olympus,  
36 Japan) equipped with a digital CMOS camera (Zyla, Andor) as described in a previous study by

1 [Nagayama et al., 2019]. Prior to an AFM imaging of the surface topography and mechanical  
2 properties of U2OS cells in PR<sub>20</sub>-treated cells, the cells were adapted to a CO<sub>2</sub>-independent medium  
3 (Invitrogen) for 30 min at room temperature (25 °C). AFM quantitative imaging (QI) mode was used  
4 to obtain a force–displacement curve at each pixel of 128×128 pixels (100 μm ×100 μm of measured  
5 area) by a precisely controlled high-speed indentation test using rectangular-shaped silicon nitride  
6 cantilevers with a cone probe (BioLever-mini, BL-AC40TS-C2, Olympus, Japan). The test was  
7 performed at a spring constant of 0.08–0.10 N/m and a nominal tip radius of 10 nm. The QI mode  
8 measurements were performed within an h after the transfer of the specimen to the AFM. These  
9 high-speed indentations were performed until a preset force of 1 nN was reached. This typically  
10 corresponded to cell indentation depths of 300–400 nm. Cell elasticity was calculated from the  
11 obtained force–displacement curves by applying the Hertzian model (Hertz, 1881), which  
12 approximates the sample to be isotropic and linearly elastic. Young’s (elastic) modulus is extracted  
13 by fitting all force–displacement curves with the following Hertzian model approximation:

$$F = \frac{2E \cdot \tan \alpha}{\pi(1 - \nu^2)} \delta^2$$

14  
15 where F is the applied force, E is the elastic modulus,  $\nu$  is the Poisson’s ratio (0.5 for a  
16 non-compressible biological sample),  $\alpha$  is the opening angle of the cone of the cantilever tip, and  $\delta$  is  
17 the indentation depth of the sample recorded in the force–displacement curves. Using the results of  
18 the Hertzian model approximation, we identified the Z contact points (specimen surface) and the  
19 elastic modulus of the specimens at each pixel and produced a surface topography map and elastic  
20 modulus map of the specimens.

21

#### 22 *Cyclic stretch experiment*

23 Cyclic stretch was performed using a uniaxial cell stretch system (Central Workshop Tsukuba  
24 University) as described in an existing study [Yamashiro et al., 2020]. The rat vascular SMCs were  
25 plated on silicon elastomer bottomed culture plates (SC4Ha, Menicon Life Science) coated with cell  
26 attachment factor containing gelatin (Thermo Fisher Scientific, S006100) and subjected to cyclic  
27 stretch with a frequency of 1.0 Hz (60 cycles/min) and 20% strain for six hours.

28

#### 29 *Statistical Analysis*

30 All experiments are presented as means ± SD. Statistical analysis was performed using Prism 8  
31 (Graph Pad). The Mann-Whitney U test, a nonparametric test, was conducted. P < 0.05 denotes  
32 statistical significance.

33

#### 34 *Data availability*

1 All data supporting the findings of this study are available from the corresponding authors on  
2 reasonable request.

3

#### 4 **Results**

##### 5 *PR<sub>20</sub>-treatment modulates the cytoskeleton architecture on U2OS cells*

6 To investigate how PR poly-dipeptides affect the cytoskeleton, we first examined the  
7 morphological changes of vimentin in U2OS cells after exposure to 1 $\mu$ M of PR<sub>20</sub> for an hour.  
8 Vimentin was predominantly localized at the perinuclear space, and bundles of vimentin were clearly  
9 detected in the control cells (CTRL; vehicle treatment) (Fig. 1A). Whereas in PR<sub>20</sub>-treated cells, the  
10 intensity of vimentin at the perinuclear space decreased, and the bundles of vimentin altered a mostly  
11 diffused background (Fig. 1A). The fluorescence intensity of vimentin at the perinuclear region was  
12 significantly reduced in PR<sub>20</sub>-treated cells ( $10.895 \pm 5.192$  a.u., n=57) compared to CTRL ( $14.616 \pm$   
13  $6.89$  a.u., n=52) (Fig. 1B). Since vimentin affects microtubule polymerization [Shabbir et al., 2014],  
14 we next investigated the effect of PR poly-dipeptides on the morphology of  $\beta$ -tubulin.  $\beta$ -tubulin  
15 showed a filamentous network in cytoplasm and the cell peripheral region (Fig. 1C). On the other  
16 hand, it appeared as dots with most of the network structure diffused in PR<sub>20</sub>-treated cells (Fig. 1C).  
17 We evaluated the tube-like structures and quantified polymerized-microtubules using ImageJ with  
18 Tubeness plugin and measured the ratio of polymerized-microtubules on each condition. Compared  
19 to CTRL ( $0.15 \pm 0.03$ , n=51), PR<sub>20</sub>-treatment significantly reduced polymerized-microtubules ( $0.11$   
20  $\pm 0.08$ , n=57; Fig. 1D). These results imply that PR poly-dipeptides induce the degradation of  
21 vimentin bundles at the perinucleus and dissociation of microtubule network.

22 As vimentin and tubulin form a structural network with actin filaments [Jiu et al., 2015]  
23 [Morris and Hollenbeck, 1995], we further investigated the effect of PR poly-dipeptides on the  
24 organization of actin filaments. In the CTRL, actin filaments were extended straight across the whole  
25 cell-body (Fig. 1E) whereas after PR<sub>20</sub>-treatment, actin filaments disappeared from central and  
26 accumulated at the peripheral of cell-body (Fig. 1E). Strength of the actin filaments was evaluated  
27 by FIJI with QuimP plugin and measured its fluorescence intensity. PR<sub>20</sub>-treated cells showed high  
28 intensity ( $1.06 \pm 0.28$ , n=56), compared to that of the CTRL ( $0.86 \pm 0.23$ , n=55; Fig. 1F). These  
29 results suggest that PR poly-dipeptides lead to alteration of actin filaments toward to cell contours  
30 and strength cortical actin filaments.

31

##### 32 *PR poly-dipeptides change in organization of actin filament and focal adhesion*

33 To examine the formation of cortical actin filaments, we evaluated Ezrin/Radixin/Moesin  
34 (ERM) proteins, which cross-link the actin filaments with the cell membrane. Activated ERM  
35 proteins by phosphorylation are necessary for forming cortical actin and filopodia by polymerized  
36 actin filaments [Furutani et al., 2007]. In PR<sub>20</sub>-treated cells, ERM proteins were dramatically

1 phosphorylated and upregulated compared to CTRL (Fig. 2A). Phospho-ERM proteins in  
2 PR<sub>20</sub>-treated cells were abundantly expressed and mainly localized to protrusive structures, such as  
3 filopodia, and not observed in the cytoplasm, while phospho-ERM localized only at the tip of the  
4 protrusion in CTRL cells (Fig. 2A). These data strongly support our findings (as presented in  
5 Fig. 1E-F) that PR poly-dipeptides lead to the reorganization of actin filaments through an activation  
6 of ERM proteins.

7       Alteration of actin filaments changes cell mechanics, thereby regulating cellular behavior  
8 such as proliferation, migration and maturation of focal adhesions [Oakes et al., 2012; Parsons et al.,  
9 2010]. Phosphorylation of paxillin recruits to vinculin on the tip of the actin stress fiber, thereby  
10 making a hub between integrins and actin filaments and resulting in the maturation of focal  
11 adhesions. Mature focal adhesions form molecular complexes and grow in size [Gardel et al., 2008].  
12 To investigate the effects of PR poly-dipeptides on maturation of focal adhesions, we evaluated the  
13 localization of vinculin, phosphorylation levels of paxillin and measured size of focal adhesions.  
14 Vinculin was predominantly expressed in nascent adhesions under nucleus in CTRL cells. However,  
15 it was localized at the cell periphery, which forms mature focal adhesions (Fig. S2A). In addition,  
16 phosphorylation levels of paxillin (pPAXILLIN) were detected at the periphery of PR<sub>20</sub>-treated cells,  
17 compared to CTRL cells (Fig. 2B). Size of pPAXILLIN was significantly larger than that of CTRL  
18 (Fig. 2C), even if the size of vinculin was comparable between the CTRL and PR<sub>20</sub>-treated cells (Fig.  
19 S2B). These observations imply that PR poly-dipeptides promote the phosphorylation of paxillin and  
20 recruitment of vinculin on focal adhesions, which lead to a maturation of focal adhesions.

#### 21 *PR poly-dipeptides increase the elasticity of the cell surface*

22       To further evaluate the changes of actin filaments and focal adhesions, we measured the  
23 elasticity of the cell surface by AFM. There were no significant differences in cell height between  
24 the two groups ( $3.87 \pm 1.01 \mu\text{m}$ , n=69 in CTRL,  $3.993 \pm 0.873 \mu\text{m}$ , n=45 in PR<sub>20</sub>-treatment; Fig. 3A,  
25 B). Interestingly, the elasticity at cell center was clearly increased in PR<sub>20</sub>-treated cells ( $12.857 \pm$   
26  $8.196 \text{ kPa}$ , n=45), compared to that of CTRL ( $8.562 \pm 5.051 \text{ kPa}$ , n=69; Fig. 3C, D). These results  
27 indicate that PR poly-dipeptides abnormally increase in cell stiffness.

#### 28 *PR poly-dipeptides attenuated the cyclic-stretch-induced reorientation of actin stress fibers*

29  
30       So far, we observed that PR-treatment induced the assemble of cortical actin and enhanced  
31 maturation of focal adhesions marked with increasing the size of pPaxillin and phosphorylation of  
32 ERM proteins. Mechanical force is transmitted via integrin and propagates into focal adhesion  
33 molecules to nucleus through actin filaments. Mechanical stress response is fundamental for  
34 maintaining cellular homeostasis, integrity and adaptation for pathological conditions. Therefore, we  
35 hypothesized that the PR poly-dipeptides-induced reconstitution of actin stress fibers alters  
36

1 mechanical stress response. To test this hypothesis, we examined the effect of PR<sub>20</sub> on cyclic  
2 stretch-induced reorientation of actin stress fibers. Instead of U2OS cells, we employed rat vascular  
3 smooth muscle cells (SMCs) which are frequently used for cyclic stretch experiments. Rat vascular  
4 SMCs with or without PR<sub>20</sub> treatment were subjected to cyclic stretch (20% strain, 1 Hz) for six  
5 hours. We then evaluated the orientation of actin stress fibers to the direction of cyclic stretch. As we  
6 expected, CTRL cells responded normally with a reorientation of actin stress fibers aligned to the  
7 perpendicular position, whereas PR<sub>20</sub>-treated cells failed to align correctly and decreased cell density  
8 after stretch (Fig. 4A). The histograms of the percentage of the orientation angle ( $\theta$ ) for each cell  
9 show that PR<sub>20</sub> significantly suppressed the cyclic stretch-induced reorientation of stress fibers ( $17.0$   
10  $\pm 10.1^\circ$ , n=96 in CTRL,  $34.286 \pm 23.104^\circ$ , n=70 in PR<sub>20</sub>-treatment; Fig 4B). These results provide  
11 strong evidence that PR poly-dipeptides cause abnormal remodeling of mechanical stress response  
12 and disorganization of cellular homeostasis.

13

#### 14 **Discussion**

15 The proper regulation of cytoskeleton architecture is important for many developmental  
16 and physiological processes in multicellular organisms [Hurtley, 1998]. Cytoskeletal proteins form a  
17 complicated network and reorganize in response to mechanical forces [Fletcher and Mullins, 2010].  
18 In this study, we demonstrated how PR poly-dipeptides alter cytoskeletal morphology and induce  
19 maturation of focal adhesions and maladaptive response to mechanical stress.

20 In ALS, an inhibition of vimentin expression during neuronal development can cause motor  
21 neuron degeneration [Gomes et al., 2019]. Vimentin is essential for the early stage of neuronal  
22 development [Yabe et al., 2003] and initially forms the neuronal network [Giasson and Mushynski,  
23 1997]. The degradation of vimentin by PR poly-dipeptides may prevent the acquisition of normal  
24 neuronal network, leading to neurodegeneration. PR poly-dipeptides also depolymerize microtubules  
25 (Fig. 1C). This result is consistent with microtubules depolymerization in the other familial ALS,  
26 *RAPGEF2* and *TUBA4A* [Smith et al., 2014; Heo et al., 2018]. Axonal transport, an important role of  
27 microtubules in neurons, is disrupted in *TUBA4A* mutation which contributes to dying back axonal  
28 damage and energy deficits in distal axons in ALS [Ferraiuolo et al., 2011], suggesting that PR  
29 poly-dipeptides treatment may also disturb axonal transport.

30 Actin filaments decrease in *PFN1* mutation [Sivadasan et al., 2016; Wu et al., 2012], and  
31 filopodia is increased in motor neurons of *SOD1* ALS mouse models [Osking et al., 2019]. As  
32 cortical actin induces neuronal differentiation [Flynn et al., 2012], the remodeling of cortical actin  
33 suggests that PR poly-dipeptides may inhibit axonal outgrowth and the normal differentiation of  
34 neurons. Filopodia is also required for synaptic connections after denervation [Osking et al., 2019].  
35 PR poly-dipeptides might affect new synaptic connections via ERM activation.

36 We also showed that PR poly-dipeptides lead to abnormal maturation of focal adhesions



1 (Fig. 2A). In a *SOD1* mutant mouse model, focal adhesions are strengthened and activated the  
2 astrocyte-associated pathway, leading to neurodegeneration [Lagos-Cabré et al., 2017]. PR  
3 poly-dipeptides also might induce neurodegeneration via signaling pathway mediated focal  
4 adhesion.

5 Further, our results show that PR poly-dipeptides change the mechanical stress response.  
6 When cytoskeletal rearrangement and redistribution of focal adhesions occur correctly, cell  
7 reorientation is observed along stretching direction [Ikawa and Sugimura, 2018]. The abnormal  
8 rearrangements of actin filaments and focal adhesions contribute to the suppression of cell  
9 reorientation. Increasing in cell stiffness which is regulated by actin organization and focal adhesions  
10 [Gauthier et al., 2012] is supported by maturation of focal adhesions in PR poly-dipeptides treatment.  
11 The distribution of actin filaments is also important for cell stiffness [Fletcher and Mullins, 2010;  
12 Smith et al., 2014]. Actin cortex forms a thin network with actin filaments and myosin motors within  
13 cell membranes. It regulates mechanical stress in the absence of stress fibers, and produces tension  
14 isotropically [Efremov et al., 2019], suggesting that PR poly-dipeptides increase cellular tension by  
15 cortical actin. Cell contraction by cytoskeleton causes neurite retraction in neurodegeneration  
16 diseases [Luo, 2002]. The stiffness of brain tissues also occurs with aging [Sack et al., 2011]. Cell  
17 stiffness may be an important key to loss of neuronal function.

18 In summary, this study observed that PR poly-dipeptides cause mechanically sensitive  
19 structural reorganization and disrupt cell homeostasis. PR-induced cytotoxicity is characterized by  
20 mechanical changes. The alternations of mechanical properties might be associated with in  
21 neurodegenerative diseases.

## 22 **Acknowledgments**

23 The authors thank Keren-Happuch E Fan Fen for their critical reading of the manuscript.

## 24 **Conflict of Interests**

25 The authors declare that there are no conflict of interests.

## 26 **Funding**

27 This work was supported by grants from AMED Brain/MINDS Beyond [JP20dm0307032] to E.M.,  
28 JSPS KAKENHI [JP20H03199 to E.M., JP19K17043 to T.S., JP19K21306, JP20K16583 to H.N.,  
29 JP19K23976 to M.N., JP19K08150 to S.Kobashigawa], Uehara Memorial Foundation to E.M. and  
30 S.Kikuchi, Naito Foundation to E.M., MSD Life Science Foundation to E.M. and Y.Y., Tokyo  
31 Biochemical Research Foundation to S.Kikuchi and by unrestricted funds provided to E.M. from Dr.  
32 Taichi Noda (KTX Corp., Aichi, Japan) and Dr. Yasuhiro Horii (Koseikai, Nara, Japan).  
33  
34  
35  
36

1 **References**

- 2 Abercrombie M, Dunn GA. 1975. Adhesions of fibroblasts to substratum during contact inhibition  
3 observed by interference reflection microscopy. *Exp Cell Res* 92:57-62.
- 4 Baniukiewicz P, Collier S, Bretschneider T. 2018. QuimP: analyzing transmembrane signalling in highly  
5 deformable cells. *Bioinformatics* 34:2695-2697.
- 6 Burridge K, Guilluy C. 2016. Focal adhesions, stress fibers and mechanical tension. *Exp Cell Res*  
7 343:14-20.
- 8 De Jonghe P, Mersivanova I, Nelis E, Del Favero J, Martin JJ, Van Broeckhoven C, Evgrafov O,  
9 Timmerman V. 2001. Further evidence that neurofilament light chain gene mutations can cause  
10 Charcot-Marie-Tooth disease type 2E. *Ann Neurol* 49:245-9.
- 11 DeJesus-Hernandez M, Mackenzie IR, Boeve BF, Boxer AL, Baker M, Rutherford NJ, Nicholson AM,  
12 Finch NA, Flynn H, Adamson J, Kouri N, Wojtas A, Sengdy P, Hsiung GY, Karydas A, Seeley WW,  
13 Josephs KA, Coppola G, Geschwind DH, Wszolek ZK, Feldman H, Knopman DS, Petersen RC, Miller  
14 BL, Dickson DW, Boylan KB, Graff-Radford NR, Rademakers R. 2011. Expanded GGGGCC  
15 hexanucleotide repeat in noncoding region of C9ORF72 causes chromosome 9p-linked FTD and ALS.  
16 *Neuron* 72:245-56.
- 17 Edwards YJ, Beecham GW, Scott WK, Khuri S, Bademci G, Tekin D, Martin ER, Jiang Z, Mash DC,  
18 ffrench-Mullen J, Pericak-Vance MA, Tsinoremas N, Vance JM. 2011. Identifying consensus disease  
19 pathways in Parkinson's disease using an integrative systems biology approach. *PLoS One* 6:e16917.
- 20 Efremov YM, Velay-Lizancos M, Weaver CJ, Athamneh AI, Zavattieri PD, Suter DM, Raman A. 2019.  
21 Anisotropy vs isotropy in living cell indentation with AFM. *Sci Rep* 9:5757.
- 22 Ferraiuolo L, Kirby J, Grierson AJ, Sendtner M, Shaw PJ. 2011. Molecular pathways of motor neuron  
23 injury in amyotrophic lateral sclerosis. *Nat Rev Neurol*. England, p 616-30.
- 24 Fletcher DA, Mullins RD. 2010. Cell mechanics and the cytoskeleton. *Nature* 463:485-92.
- 25 Flynn KC, Hellal F, Neukirchen D, Jacob S, Tahirovic S, Dupraz S, Stern S, Garvalov BK, Gurniak C,  
26 Shaw AE, Meyn L, Wedlich-Söldner R, Bamburg JR, Small JV, Witke W, Bradke F. 2012.  
27 ADF/cofilin-mediated actin retrograde flow directs neurite formation in the developing  
28 brain. *Neuron*. United States: © 2012 Elsevier Inc, p 1091-107.
- 29 Furutani Y, Matsuno H, Kawasaki M, Sasaki T, Mori K, Yoshihara Y. 2007. Interaction between  
30 telencephalin and ERM family proteins mediates dendritic filopodia formation. *J Neurosci* 27:8866-76.
- 31 Galloway PG, Perry G, Gambetti P. 1987. Hirano body filaments contain actin and actin-associated  
32 proteins. *J Neuropathol Exp Neurol* 46:185-99.
- 33 Gardel ML, Sabass B, Ji L, Danuser G, Schwarz US, Waterman CM. 2008. Traction stress in focal  
34 adhesions correlates biphasically with actin retrograde flow speed. *J Cell Biol* 183:999-1005.
- 35 Gauthier NC, Masters TA, Sheetz MP. 2012. Mechanical feedback between membrane tension and  
36 dynamics. *Trends Cell Biol*. England: 2012 Elsevier Ltd, p 527-35.

- 1 Giasson BI, Mushynski WE. 1997. Developmentally regulated stabilization of neuronal intermediate  
2 filaments in rat cerebral cortex. *Neurosci Lett* 229:77-80.
- 3 Gomes C, Cunha C, Nascimento F, Ribeiro JA, Vaz AR, Brites D. 2019. Cortical Neurotoxic Astrocytes  
4 with Early ALS Pathology and miR-146a Deficit Replicate Gliosis Markers of Symptomatic SOD1G93A  
5 Mouse Model. *Mol Neurobiol*. United States, p 2137-2158.
- 6 Heo K, Lim SM, Nahm M, Kim YE, Oh KW, Park HT, Ki CS, Kim SH, Lee S. 2018. A De Novo  
7 RAPGEF2 Variant Identified in a Sporadic Amyotrophic Lateral Sclerosis Patient Impairs Microtubule  
8 Stability and Axonal Mitochondria Distribution. *Exp Neurobiol* 27:550-563.
- 9 Hurtley SM. 1998. Cell biology of the cytoskeleton. *Science* 279:459.
- 10 Ikawa K, Sugimura K. 2018. AIP1 and cofilin ensure a resistance to tissue tension and promote  
11 directional cell rearrangement. *Nat Commun* 9:3295.
- 12 Jiu Y, Lehtimäki J, Tojkander S, Cheng F, Jääliñoja H, Liu X, Varjosalo M, Eriksson JE, Lappalainen P.  
13 2015. Bidirectional Interplay between Vimentin Intermediate Filaments and Contractile Actin Stress  
14 Fibers. *Cell Rep* 11:1511-8.
- 15 Kwon I, Xiang S, Kato M, Wu L, Theodoropoulos P, Wang T, Kim J, Yun J, Xie Y, McKnight SL. 2014.  
16 Poly-dipeptides encoded by the C9orf72 repeats bind nucleoli, impede RNA biogenesis, and kill cells.  
17 *Science* 345:1139-45.
- 18 Lagos-Cabré R, Alvarez A, Kong M, Burgos-Bravo F, Cárdenas A, Rojas-Mancilla E, Pérez-Nuñez R,  
19 Herrera-Molina R, Rojas F, Schneider P, Herrera-Marschitz M, Quest AFG, van Zundert B, Leyton L.  
20 2017.  $\alpha(V)\beta(3)$  Integrin regulates astrocyte reactivity. *J Neuroinflammation* 14:194.
- 21 Leigh PN, Dodson A, Swash M, Brion JP, Anderton BH. 1989. Cytoskeletal abnormalities in motor  
22 neuron disease. An immunocytochemical study. *Brain* 112 ( Pt 2):521-35.
- 23 Leshchynska I, Sytnyk V. 2016. Synaptic Cell Adhesion Molecules in Alzheimer's Disease. *Neural Plast*  
24 2016:6427537.
- 25 Lin Y, Mori E, Kato M, Xiang S, Wu L, Kwon I, McKnight SL. 2016. Toxic PR Poly-Dipeptides Encoded  
26 by the C9orf72 Repeat Expansion Target LC Domain Polymers. *Cell* 167:789-802 e12.
- 27 Luo L. 2002. Actin cytoskeleton regulation in neuronal morphogenesis and structural  
28 plasticity. *Annu Rev Cell Dev Biol*. United States, p 601-35.
- 29 Morris RL, Hollenbeck PJ. 1995. Axonal transport of mitochondria along microtubules and F-actin in  
30 living vertebrate neurons. *J Cell Biol* 131:1315-26.
- 31 Nagayama K, Uchida K, Sato A. 2019. A novel micro-grooved collagen substrate for inducing vascular  
32 smooth muscle differentiation through cell tissue arrangement and nucleus remodeling. *J  
33 Mech Behav Biomed Mater*. Netherlands: 2018 Elsevier Ltd, p 295-305.
- 34 Oakes PW, Beckham Y, Stricker J, Gardel ML. 2012. Tension is required but not sufficient for focal  
35 adhesion maturation without a stress fiber template. *J Cell Biol* 196:363-74.
- 36 Osking Z, Ayers JI, Hildebrandt R, Skruber K, Brown H, Ryu D, Eukovich AR, Golde TE, Borchelt DR,

- 1 Read TA, Vitriol EA. 2019. ALS-Linked SOD1 Mutants Enhance Neurite Outgrowth and Branching in  
2 Adult Motor Neurons. *iScience* 19:448-449.
- 3 Parsons JT, Horwitz AR, Schwartz MA. 2010. Cell adhesion: integrating cytoskeletal dynamics and  
4 cellular tension. *Nat Rev Mol Cell Biol* 11:633-43.
- 5 Rowland LP, Shneider NA. 2001. Amyotrophic lateral sclerosis. *N Engl J Med* 344:1688-700.
- 6 Sack I, Streitberger KJ, Krefting D, Paul F, Braun J. 2011. The influence of physiological aging and  
7 atrophy on brain viscoelastic properties in humans. *PLoS One* 6:e23451.
- 8 Shabbir SH, Cleland MM, Goldman RD, Mrksich M. 2014. Geometric control of vimentin intermediate  
9 filaments. *Biomaterials* 35:1359-66.
- 10 Sivadasan R, Hornburg D, Drepper C, Frank N, Jablonka S, Hansel A, Lojewski X, Sternecker J,  
11 Hermann A, Shaw PJ, Ince PG, Mann M, Meissner F, Sendtner M. 2016. C9ORF72 interaction with  
12 cofilin modulates actin dynamics in motor neurons. *Nat Neurosci*. United States, p  
13 1610-1618.
- 14 Smith BN, Ticozzi N, Fallini C, Gkazi AS, Topp S, Kenna KP, Scotter EL, Kost J, Keagle P, Miller JW,  
15 Calini D, Vance C, Danielson EW, Troakes C, Tiloca C, Al-Sarraj S, Lewis EA, King A, Colombrita C,  
16 Pensato V, Castellotti B, de Belleruche J, Baas F, ten Asbroek AL, Sapp PC, McKenna-Yasek D,  
17 McLaughlin RL, Polak M, Asress S, Esteban-Perez J, Munoz-Blanco JL, Simpson M, van Rheenen W,  
18 Diekstra FP, Lauria G, Duga S, Corti S, Cereda C, Corrado L, Soraru G, Morrison KE, Williams KL,  
19 Nicholson GA, Blair IP, Dion PA, Leblond CS, Rouleau GA, Hardiman O, Veldink JH, van den Berg LH,  
20 Al-Chalabi A, Pall H, Shaw PJ, Turner MR, Talbot K, Taroni F, Garcia-Redondo A, Wu Z, Glass JD,  
21 Gellera C, Ratti A, Brown RH, Jr., Silani V, Shaw CE, Landers JE. 2014. Exome-wide rare variant  
22 analysis identifies TUBA4A mutations associated with familial ALS. *Neuron* 84:324-31.
- 23 Webster CP, Smith EF, Bauer CS, Moller A, Hautbergue GM, Ferraiuolo L, Myszczyńska MA,  
24 Higginbottom A, Walsh MJ, Whitworth AJ, Kaspar BK, Meyer K, Shaw PJ, Grierson AJ, De Vos KJ.  
25 2016. The C9orf72 protein interacts with Rab1a and the ULK1 complex to regulate initiation of  
26 autophagy. *EMBO J* 35:1656-76.
- 27 Wu CH, Fallini C, Ticozzi N, Keagle PJ, Sapp PC, Piotrowska K, Lowe P, Koppers M, McKenna-Yasek  
28 D, Baron DM, Kost JE, Gonzalez-Perez P, Fox AD, Adams J, Taroni F, Tiloca C, Leclerc AL, Chafe SC,  
29 Mangroo D, Moore MJ, Zitzewitz JA, Xu ZS, van den Berg LH, Glass JD, Siciliano G, Cirulli ET,  
30 Goldstein DB, Salachas F, Meininger V, Rossoll W, Ratti A, Gellera C, Bosco DA, Bassell GJ, Silani V,  
31 Drory VE, Brown RH, Jr., Landers JE. 2012. Mutations in the profilin 1 gene cause familial amyotrophic  
32 lateral sclerosis. *Nature* 488:499-503.
- 33 Yabe JT, Chan WK, Wang FS, Pimenta A, Ortiz DD, Shea TB. 2003. Regulation of the transition from  
34 vimentin to neurofilaments during neuronal differentiation. *Cell Motil Cytoskeleton* 56:193-205.
- 35 Yamashiro Y, Thang BQ, Ramirez K, Shin SJ, Kohata T, Ohata S, Nguyen TAV, Ohtsuki S, Nagayama K,  
36 Yanagisawa H. 2020. Matrix mechanotransduction mediated by thrombospondin-1/integrin/YAP in the

1 vascular remodeling. Proc Natl Acad Sci U S A 117:9896-9905.  
2 Zhang K, Daigle JG, Cunningham KM, Coyne AN, Ruan K, Grima JC, Bowen KE, Wadhwa H, Yang P,  
3 Rigo F, Taylor JP, Gitler AD, Rothstein JD, Lloyd TE. 2018. Stress Granule Assembly Disrupts  
4 Nucleocytoplasmic Transport. Cell 173:958-971.e17.  
5 Zhang K, Donnelly CJ, Haeusler AR, Grima JC, Machamer JB, Steinwald P, Daley EL, Miller SJ,  
6 Cunningham KM, Vidensky S, Gupta S, Thomas MA, Hong I, Chiu SL, Haganir RL, Ostrow LW,  
7 Matunis MJ, Wang J, Sattler R, Lloyd TE, Rothstein JD. 2015. The C9orf72 repeat expansion disrupts  
8 nucleocytoplasmic transport. Nature 525:56-61.

9  
10

### 11 **Figure legend**

#### 12 **Figure 1. PR<sub>20</sub> changes the architecture of cytoskeleton.**

13 Immunostaining of vimentin (A),  $\beta$ -tubulin (C) and Phalloidin (E) after treatment of 10  $\mu$ M PR<sub>20</sub> or  
14 untreated control. Scale bars are 50  $\mu$ m. (B) Quantification of the fluorescence intensity of vimentin  
15 at perinuclear region. (D) The ratio of microtubule polymers to each cell area. (F) Average  
16 fluorescence intensity of actin filament in CTRL (n=55) and PR<sub>20</sub>-treated cells (n=56). \*P<0.05,  
17 Mann–Whitney U test.

18  
19

#### 20 **Figure 2. PR<sub>20</sub> affects cytoskeletal actin binding proteins and focal adhesion (FA).**

21 A. Immunostaining of U2OS cells treated by 10  $\mu$ M PR<sub>20</sub> with phospho-ERM (red in A). B.  
22 Immunostaining of U2OS cells treated by 10  $\mu$ M PR<sub>20</sub> with pPAXILLIN (red in B), Phalloidin  
23 (green) and DAPI (blue) are shown. Scale bars are 50  $\mu$ m. Focal adhesion size was evaluated by  
24 pPAXILLIN (in B) and quantified using ImageJ in CTRL (n=44) and PR<sub>20</sub>-treated cells (n=52) (C).  
25 \*P<0.05, Mann–Whitney U test.

26

#### 27 **Figure 3. AFM images of the surface of U2OS cells.**

28 Representative surface topographic images (A) and elastic modulus maps (C) of U2OS cells  
29 measured by AFM. Scale bars are 20  $\mu$ m. Quantification of cell height (B) and elastic modulus at  
30 cell center (D) in CTRL (n=69) and PR<sub>20</sub>-treated (n=45) are shown. \*P<0.05, Mann–Whitney U test.

31

#### 32 **Figure 4. PR<sub>20</sub> prohibits the cyclic-stretch-induced reorientation of actin stress fiber in rat 33 vascular SMCs.**

34 Rat vascular SMCs with or without 10  $\mu$ M of PR<sub>20</sub> were subjected to cyclic stretch (20% strain, 1.0  
35 Hz (60 cycles/min) for six hours. A. Two-way arrows indicate stretch direction. Phalloidin (red) and  
36 DAPI (blue) also shown. Scale bars are 100  $\mu$ m. B. The orientation of each cell (bottom) was

1 analyzed by measuring the orientation angle ( $\theta$ ) of the long axis of the ellipse relative to the stretch  
2 axis in CTRL (n=96) and PR<sub>20</sub>-treated cells (n=70).

3

4 **Supplemental figure 1. Quantification of F-actin fluorescence intensity.**

5 Schema of QuimP analysis procedure. Measurement of the fluorescence intensity of phalloidin using  
6 ImageJ. Automatically fit contours along the ROI drawn around the edge of the cell and measure the  
7 fluorescence intensity in the strip-shaped region of the width 0.7  $\mu$ m inside the drawn contour.

8

9 **Supplemental figure 2. PR<sub>20</sub> affects vinculin**

10 (A) Immunostaining of U2OS cells treated by 10  $\mu$ M PR<sub>20</sub>. Phalloidin (green), Vinculin (red) and  
11 DAPI (blue) are shown. Scale bar is 50  $\mu$ m. (B) Focal adhesion size was evaluated by size of  
12 vinculin (in A) and quantified using ImageJ in CTRL (n=53) and PR<sub>20</sub>-treated cells (n=60). \*P<0.05,  
13 Mann–Whitney U test.

14

15

16

17

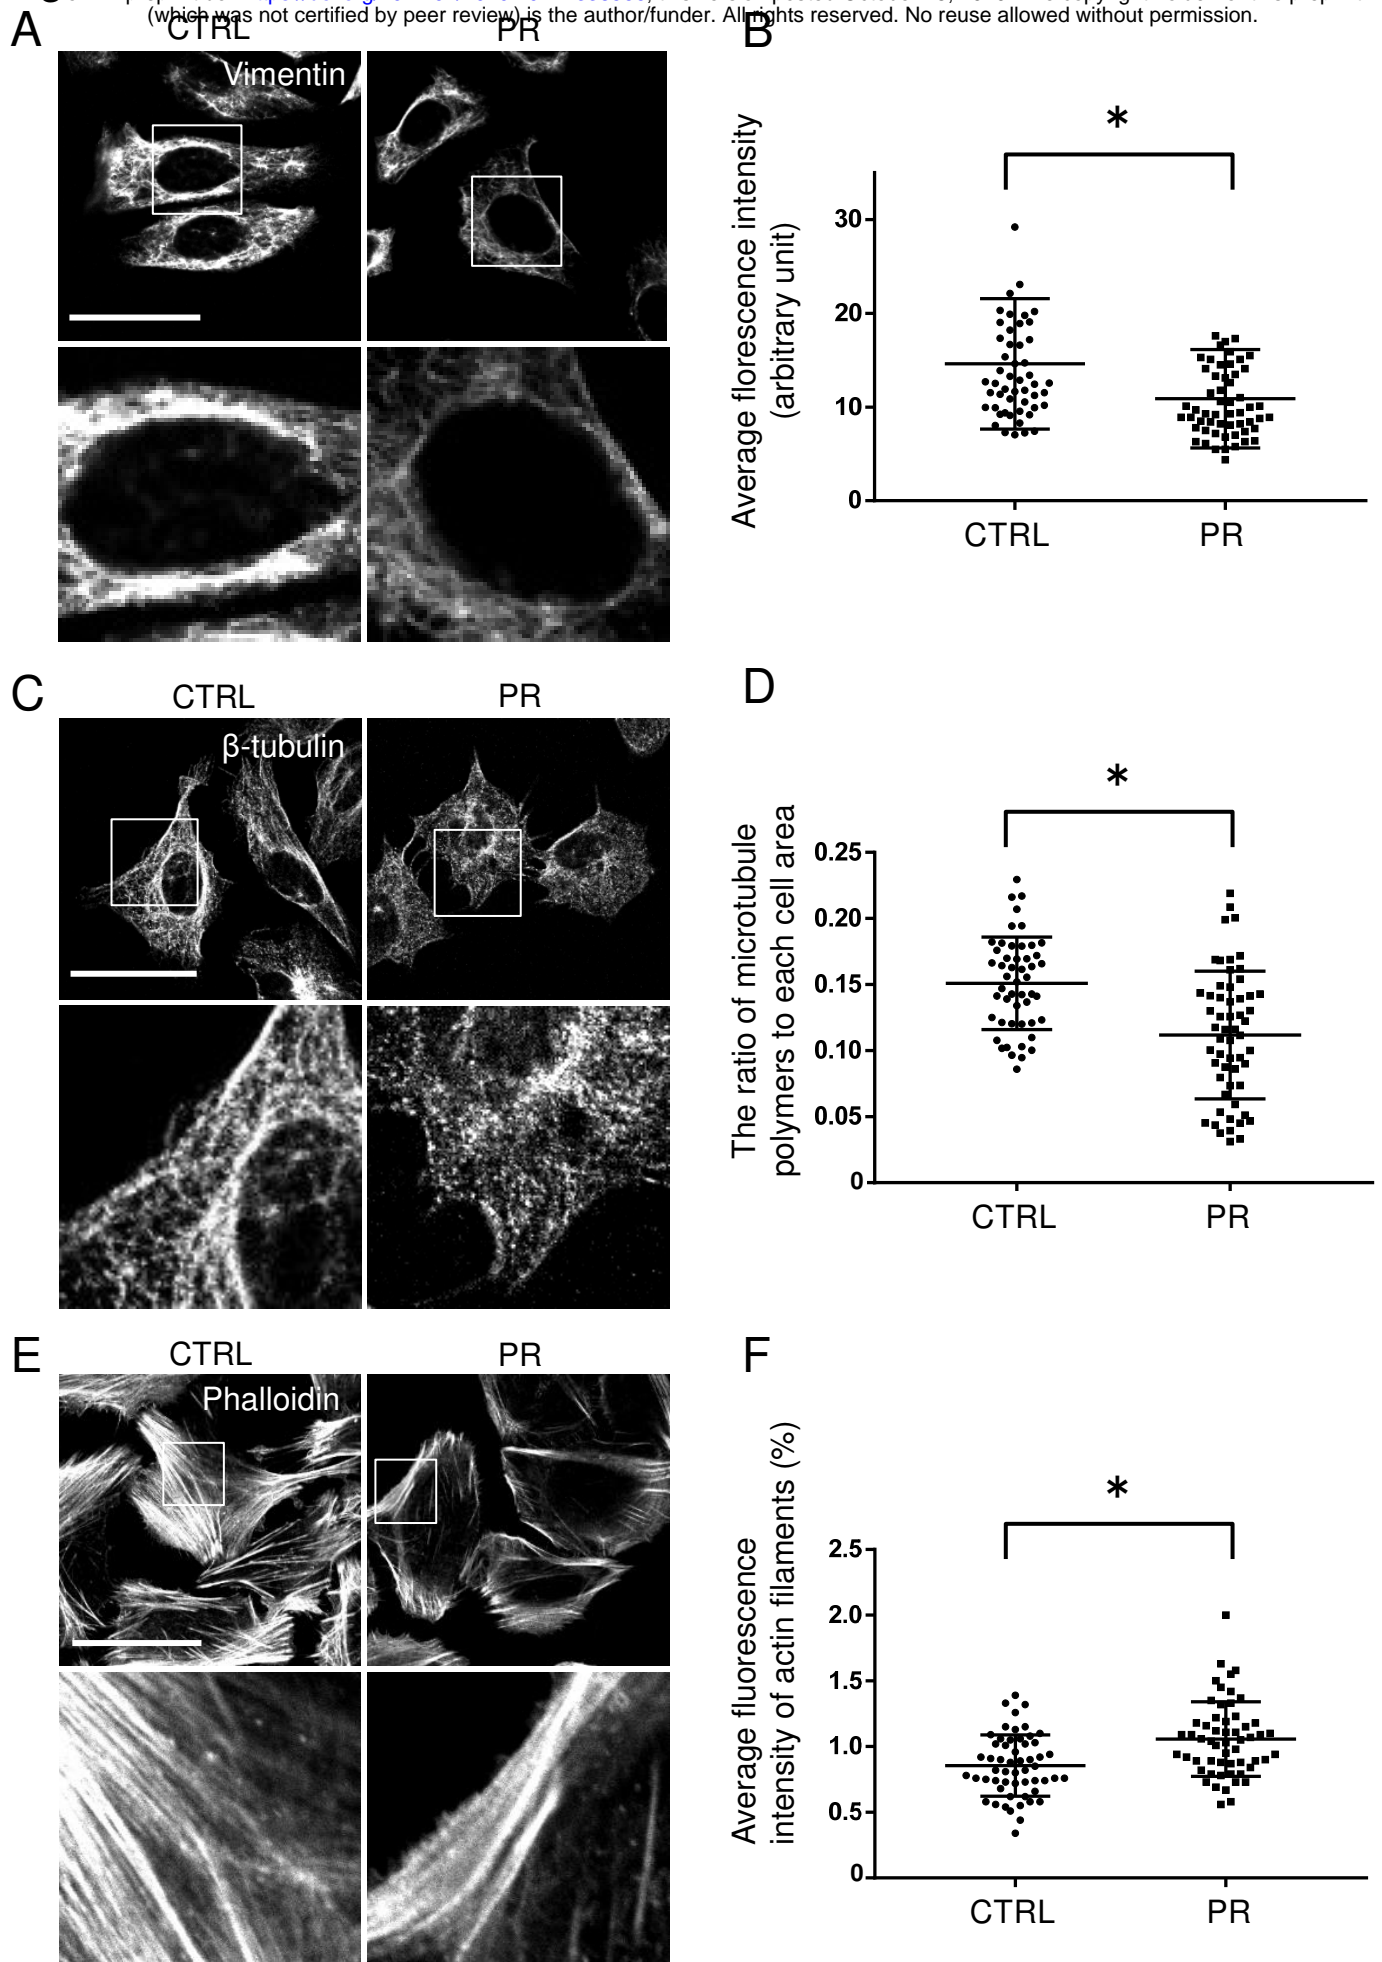

Fig 2.

bioRxiv preprint doi: <https://doi.org/10.1101/2020.10.14.338566>; this version posted October 15, 2020. The copyright holder for this preprint (which was not certified by peer review) is the author/funder. All rights reserved. No reuse allowed without permission.

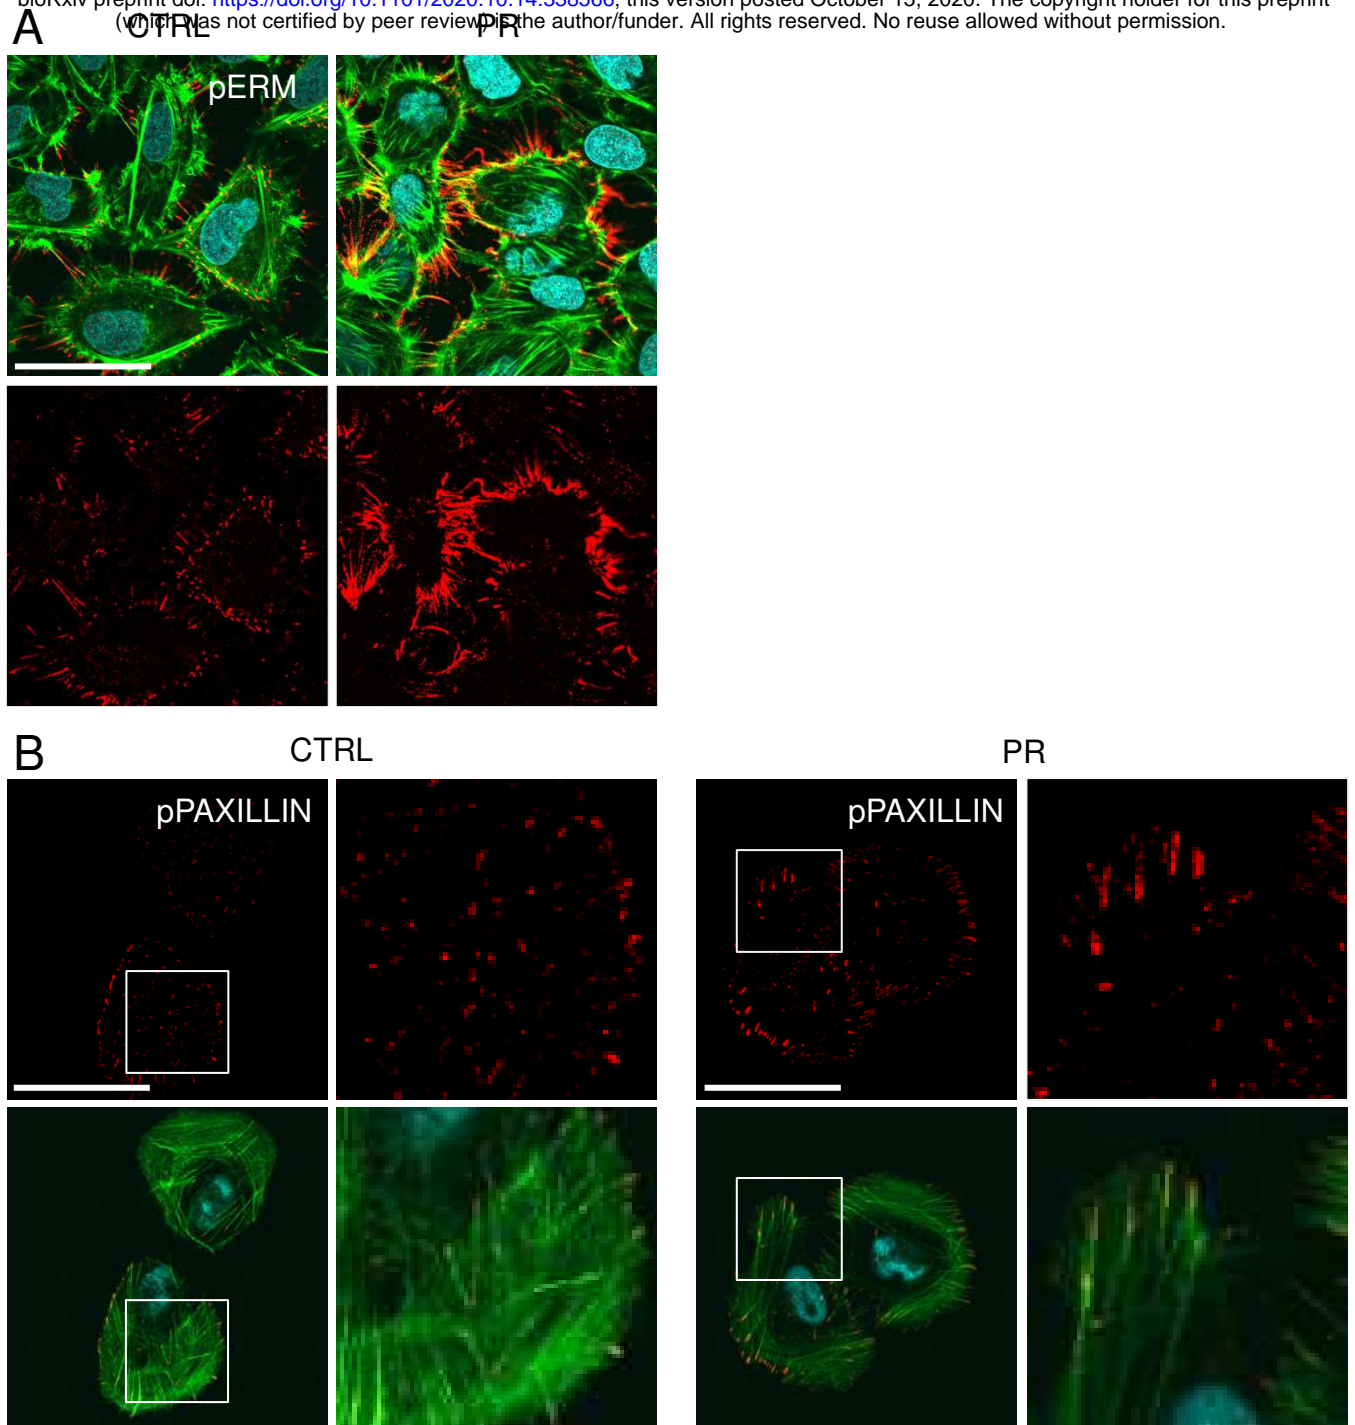



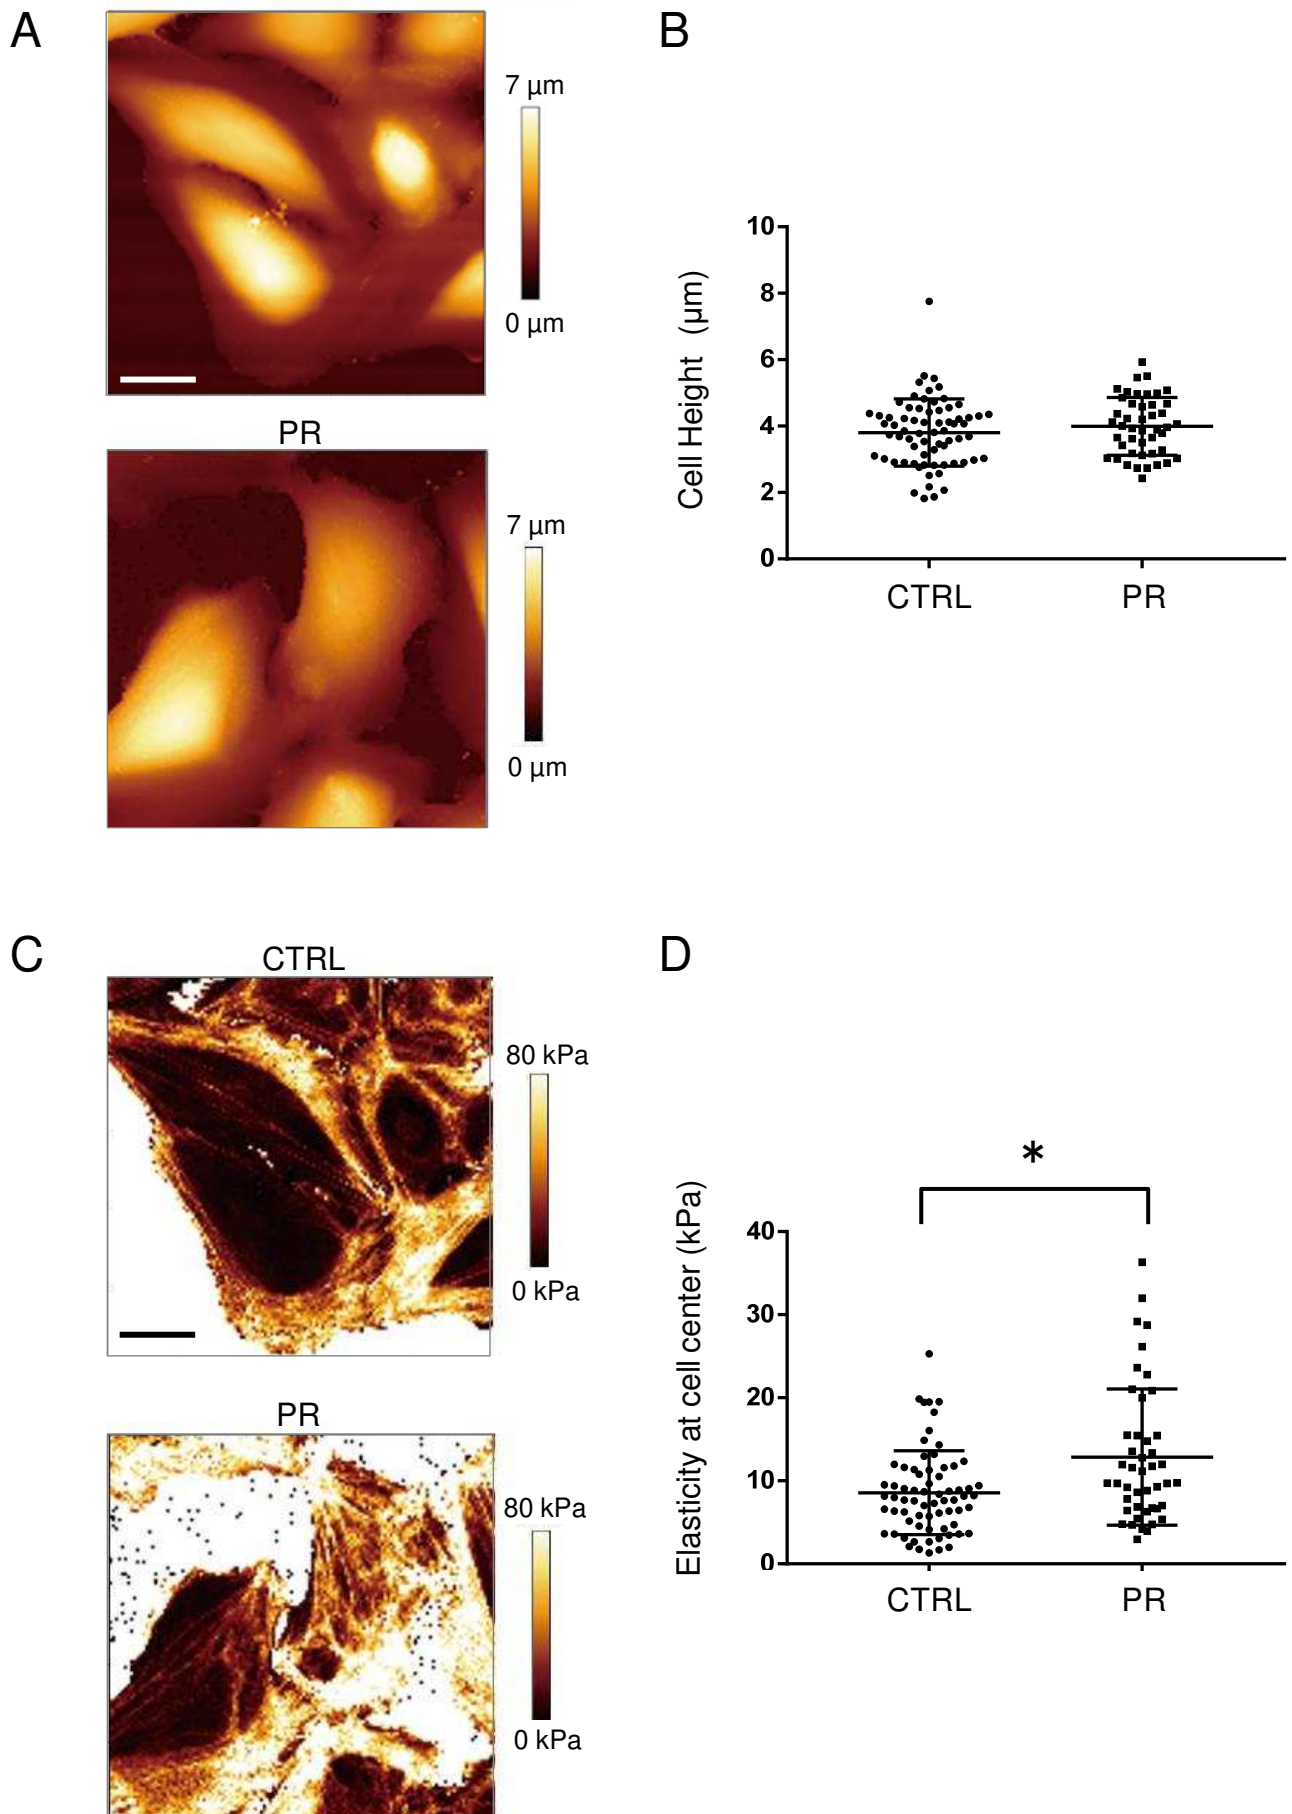

## Fig 4.

A

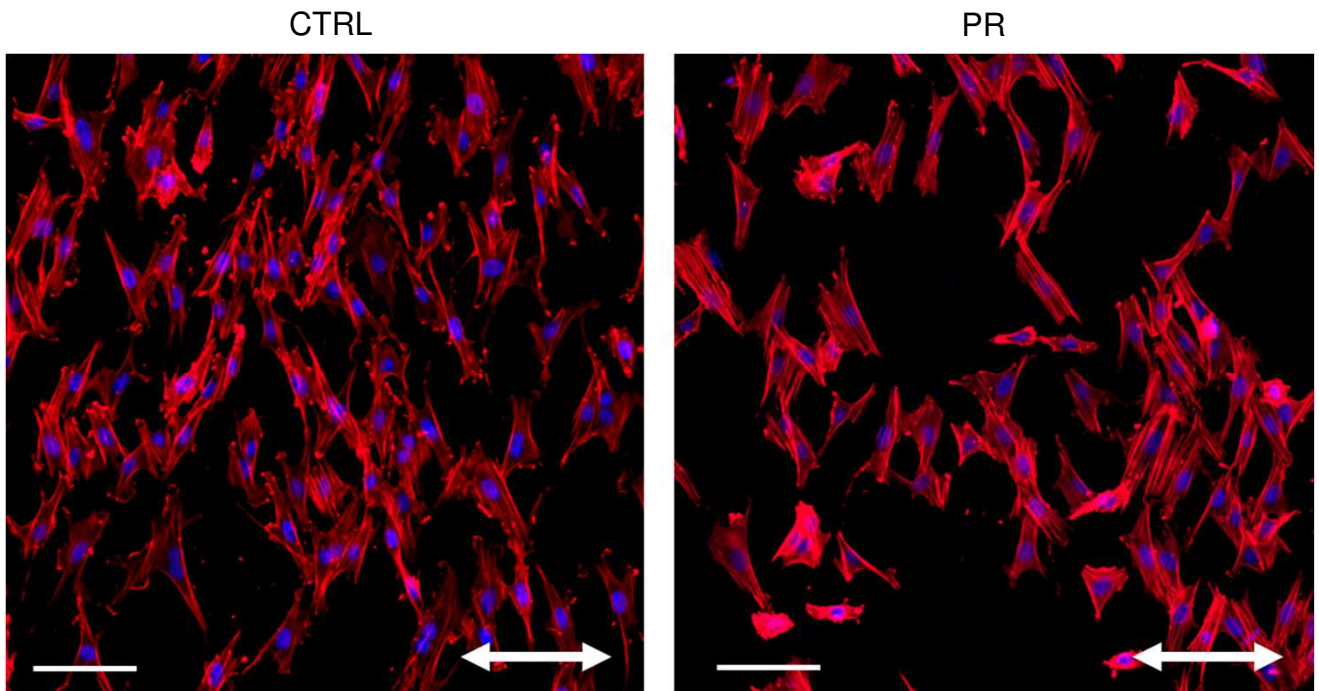

B

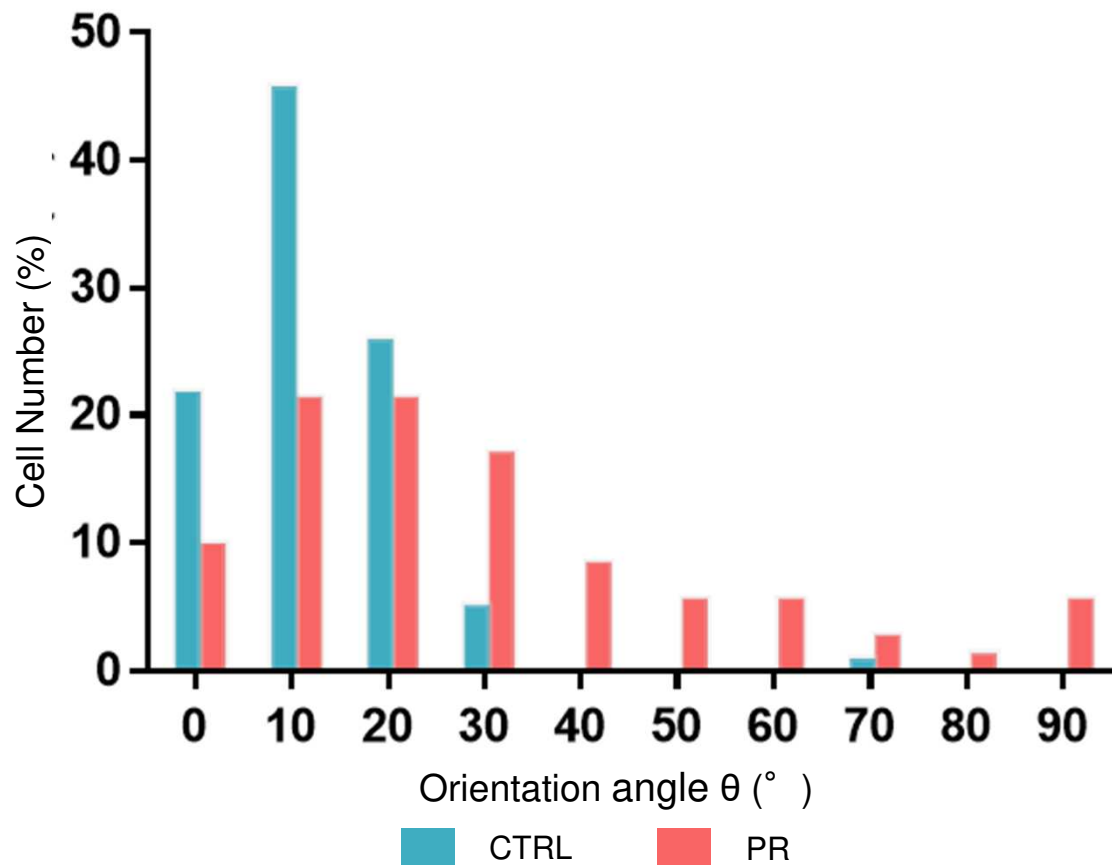

Source: https://www.biorxiv.org/content/10.1101/2020.10.14.338566v1.full.pdf
